# Supplementary material for: Plasma Fetuin-A Levels and Risk of Type 2 Diabetes Mellitus in A Chinese Population: A Nested Case-Control Study
Source: PubMed Central journal article supplement — Diabetes Metab J. 2019 Mar 20;43(4):474–86. doi: 10.4093/dmj.2018.0171 (PMC6712221; doi:10.4093/dmj.2018.0171), 2019-03-20
Supplement: dmj-43-474-s001.pdf [file dmj-43-474-s001.pdf]

**Supplementary Table 1.** The pair-wise Pearson correlation coefficients between fetuin-A, age, BMI, plasma measures of ALT, lipids, hs-CRP, adiponectin, random insulin, random glucose and HbA1c levels, the Singapore Chinese Health Study

| Marker         | Controls          | Cases             | Total             |
|----------------|-------------------|-------------------|-------------------|
| Age            | 0.01              | -0.01             | -0.01             |
| BMI            | 0.09              | 0.07              | 0.10 <sup>b</sup> |
| ALT            | 0.05              | 0.09 <sup>a</sup> | 0.10 <sup>b</sup> |
| TC             | 0.07              | 0.09 <sup>a</sup> | 0.08 <sup>b</sup> |
| HDL-C          | -0.04             | 0.01              | -0.04             |
| TG             | 0.04              | -0.01             | 0.04              |
| hs-CRP         | 0.09 <sup>a</sup> | 0.08              | 0.10 <sup>b</sup> |
| Adiponectin    | -0.04             | -0.01             | -0.05             |
| Random insulin | 0.01              | 0.05              | 0.05              |
| Random glucose | -0.02             | 0.01              | 0.03              |
| HbA1c          | 0.03              | -0.01             | 0.04              |

BMI, body mass index; ALT, alanine aminotransferase; hs-CRP, high-sensitivity C-reactive protein; HbA1c, glycosylated hemoglobin; TC, total cholesterol; HDL-C, high density lipoprotein cholesterol; TG, triglyceride.

<sup>a</sup>Correlation coefficients are statistically significant at  $P < 0.05$ , <sup>b</sup>Correlation coefficients are statistically significant at  $P < 0.01$ .
