# Supplementary material for: Plasma Fetuin-A Levels and Risk of Type 2 Diabetes Mellitus in A Chinese Population: A Nested Case-Control Study
Source: PubMed Central journal article supplement — Diabetes Metab J. 2019 Mar 20;43(4):474–86. doi: 10.4093/dmj.2018.0171 (PMC6712221; doi:10.4093/dmj.2018.0171), 2019-03-20
Supplement: dmj-43-474-s002.pdf [file dmj-43-474-s002.pdf]

**Supplementary Table 2.** Odds ratios (95% confidence intervals) of type 2 diabetes mellitus by stratified analysis, the Singapore Chinese Health Study

| Variable                               | Quintiles of fetuin-A |      |                  |                  |                  |                  | P interaction <sup>a</sup> |
|----------------------------------------|-----------------------|------|------------------|------------------|------------------|------------------|----------------------------|
|                                        | No.                   | Q1   | Q2               | Q3               | Q4               | Q5               |                            |
| Age <sup>b</sup> , yr                  |                       |      |                  |                  |                  |                  | 0.99                       |
| <60                                    | 622                   | 1.00 | 0.89 (0.47–1.68) | 1.67 (0.91–3.05) | 1.72 (0.98–3.03) | 1.44 (0.82–2.55) |                            |
| ≥60                                    | 494                   | 1.00 | 0.96 (0.53–1.73) | 1.15 (0.65–2.04) | 1.48 (0.82–2.66) | 1.30 (0.72–2.37) |                            |
| Sex <sup>c</sup>                       |                       |      |                  |                  |                  |                  | 0.32                       |
| Male                                   | 466                   | 1.00 | 1.37 (0.65–2.88) | 2.10 (0.97–4.55) | 2.78 (1.22–6.35) | 2.45 (1.08–5.55) |                            |
| Female                                 | 650                   | 1.00 | 1.11 (0.57–2.16) | 2.06 (1.01–4.18) | 1.83 (0.93–3.58) | 1.82 (0.88–3.75) |                            |
| BMI <sup>b</sup> , kg/m <sup>2</sup>   |                       |      |                  |                  |                  |                  | 0.19                       |
| <23                                    | 493                   | 1.00 | 1.04 (0.56–1.95) | 1.44 (0.79–2.61) | 1.89 (1.01–3.53) | 1.89 (1.01–3.51) |                            |
| ≥23                                    | 623                   | 1.00 | 1.07 (0.60–1.91) | 1.52 (0.86–2.70) | 1.54 (0.92–2.59) | 1.34 (0.79–2.26) |                            |
| Alcohol consumption <sup>b</sup>       |                       |      |                  |                  |                  |                  | 0.30                       |
| Never                                  | 972                   | 1.00 | 1.07 (0.68–1.69) | 1.70 (1.10–2.65) | 1.83 (1.19–2.80) | 1.66 (1.08–2.55) |                            |
| Weekly or daily                        | 144                   | 1.00 | 0.49 (0.13–1.89) | 0.32 (0.09–1.18) | 0.65 (0.18–2.32) | 0.62 (0.18–2.20) |                            |
| Physical activity <sup>b</sup> , hr/wk |                       |      |                  |                  |                  |                  | 0.53                       |
| <0.5                                   | 889                   | 1.00 | 0.95 (0.59–1.53) | 1.31 (0.83–2.08) | 1.46 (0.94–2.26) | 1.36 (0.87–2.14) |                            |
| ≥0.5                                   | 227                   | 1.00 | 1.10 (0.40–3.02) | 1.77 (0.67–4.64) | 2.66 (1.04–6.85) | 1.81 (0.72–4.56) |                            |
| Fasting status <sup>b</sup>            |                       |      |                  |                  |                  |                  | 0.35                       |
| Fasting                                | 325                   | 1.00 | 0.37 (0.16–0.87) | 1.25 (0.55–2.83) | 1.65 (0.76–3.56) | 1.35 (0.61–2.95) |                            |
| Non-fasting                            | 791                   | 1.00 | 1.38 (0.84–2.27) | 1.54 (0.95–2.51) | 1.69 (1.05–2.71) | 1.54 (0.95–2.48) |                            |
| hs-CRP <sup>b</sup> , mg/L             |                       |      |                  |                  |                  |                  | 0.58                       |
| <1.5                                   | 546                   | 1.00 | 0.76 (0.41–1.42) | 1.01 (0.56–1.82) | 1.56 (0.89–2.75) | 1.37 (0.75–2.50) |                            |
| ≥1.5                                   | 570                   | 1.00 | 1.37 (0.75–2.51) | 2.04 (1.12–3.70) | 1.83 (1.03–3.24) | 1.50 (0.86–2.61) |                            |
| Adiponectin <sup>b</sup> , µg/mL       |                       |      |                  |                  |                  |                  | 0.38                       |
| <7.4                                   | 541                   | 1.00 | 0.76 (0.39–1.49) | 1.32 (0.69–2.53) | 1.92 (1.01–3.64) | 1.03 (0.55–1.92) |                            |
| ≥7.4                                   | 575                   | 1.00 | 1.01 (0.56–1.84) | 1.12 (0.63–2.00) | 1.24 (0.70–2.17) | 1.66 (0.95–2.92) |                            |
| ALT <sup>b</sup> , IU/L                |                       |      |                  |                  |                  |                  | 0.43                       |
| <23                                    | 525                   | 1.00 | 0.90 (0.50–1.62) | 1.02 (0.56–1.84) | 1.21 (0.68–2.13) | 0.98 (0.54–1.79) |                            |
| ≥23                                    | 591                   | 1.00 | 1.06 (0.57–1.99) | 1.61 (0.89–2.91) | 1.85 (1.03–3.32) | 1.46 (0.82–2.59) |                            |
| TG <sup>b</sup> , mmol/L               |                       |      |                  |                  |                  |                  | 0.96                       |
| <1.8                                   | 554                   | 1.00 | 0.89 (0.47–1.66) | 1.54 (0.85–2.80) | 1.66 (0.93–2.95) | 1.20 (0.65–2.19) |                            |
| ≥1.8                                   | 562                   | 1.00 | 1.02 (0.55–1.89) | 1.24 (0.68–2.26) | 1.68 (0.94–3.03) | 1.51 (0.84–2.70) |                            |
| HDL-C <sup>b</sup> , mmol/L            |                       |      |                  |                  |                  |                  | 0.12                       |
| <1.125                                 | 552                   | 1.00 | 0.79 (0.42–1.49) | 1.28 (0.70–2.34) | 1.49 (0.82–2.69) | 1.02 (0.57–1.83) |                            |
| ≥1.125                                 | 564                   | 1.00 | 1.20 (0.66–2.19) | 1.39 (0.77–2.50) | 1.74 (0.99–3.07) | 1.77 (0.99–3.17) |                            |
| HbA1c <sup>c</sup> , %                 |                       |      |                  |                  |                  |                  | 0.29                       |
| <6.5                                   | 574                   | 1.00 | 0.96 (0.45–2.06) | 1.49 (0.70–3.17) | 1.81 (0.85–3.87) | 1.85 (0.84–4.08) |                            |
| ≥6.5                                   | 542                   | 1.00 | 1.52 (0.78–2.99) | 2.96 (1.41–6.22) | 2.21 (1.07–4.53) | 2.47 (1.15–5.29) |                            |

BMI, body mass index; hs-CRP, high-sensitivity C-reactive protein; ALT, alanine aminotransferase; TG, triglyceride; HDL-C, high density lipoprotein cholesterol; HbA1c, glycosylated hemoglobin.

<sup>a</sup>P interaction was tested by adding an interaction term (each binary variable×continuous fetuin-A) to the regression models using restricted cubic spline analysis, <sup>b</sup>Odds ratios were estimated using unconditional logistic regression models after adjusting for age at blood taken (continuous), sex (male, female), dialect group (Cantonese, Hokkien), smoking status (never, ever smoker), alcohol intake (never, weekly, or daily), moderate-to-vigorous weekly activity levels (<0.5, 0.5 to 3.9, and ≥4 hours/week), education levels (primary school and below, secondary or above), history of hypertension (yes, no), fasting status (yes, no), and body mass index (continuous), except for stratifying factors, <sup>c</sup>Odds ratios were estimated using conditional logistic regression models after adjusting for age at blood taken (continuous), smoking status (never, ever smoker), alcohol intake (never, weekly, or daily), moderate-to-vigorous weekly activity levels (<0.5, 0.5 to 3.9, and ≥4 hours/week), education levels (primary school and below, secondary or above), history of hypertension (yes, no), fasting status (yes, no), and body mass index (continuous).
