# Supplementary material for: Plasma Fetuin-A Levels and Risk of Type 2 Diabetes Mellitus in A Chinese Population: A Nested Case-Control Study
Source: PubMed Central journal article supplement — Diabetes Metab J. 2019 Mar 20;43(4):474–86. doi: 10.4093/dmj.2018.0171 (PMC6712221; doi:10.4093/dmj.2018.0171), 2019-03-20
Supplement: dmj-43-474-s003.pdf [file dmj-43-474-s003.pdf]

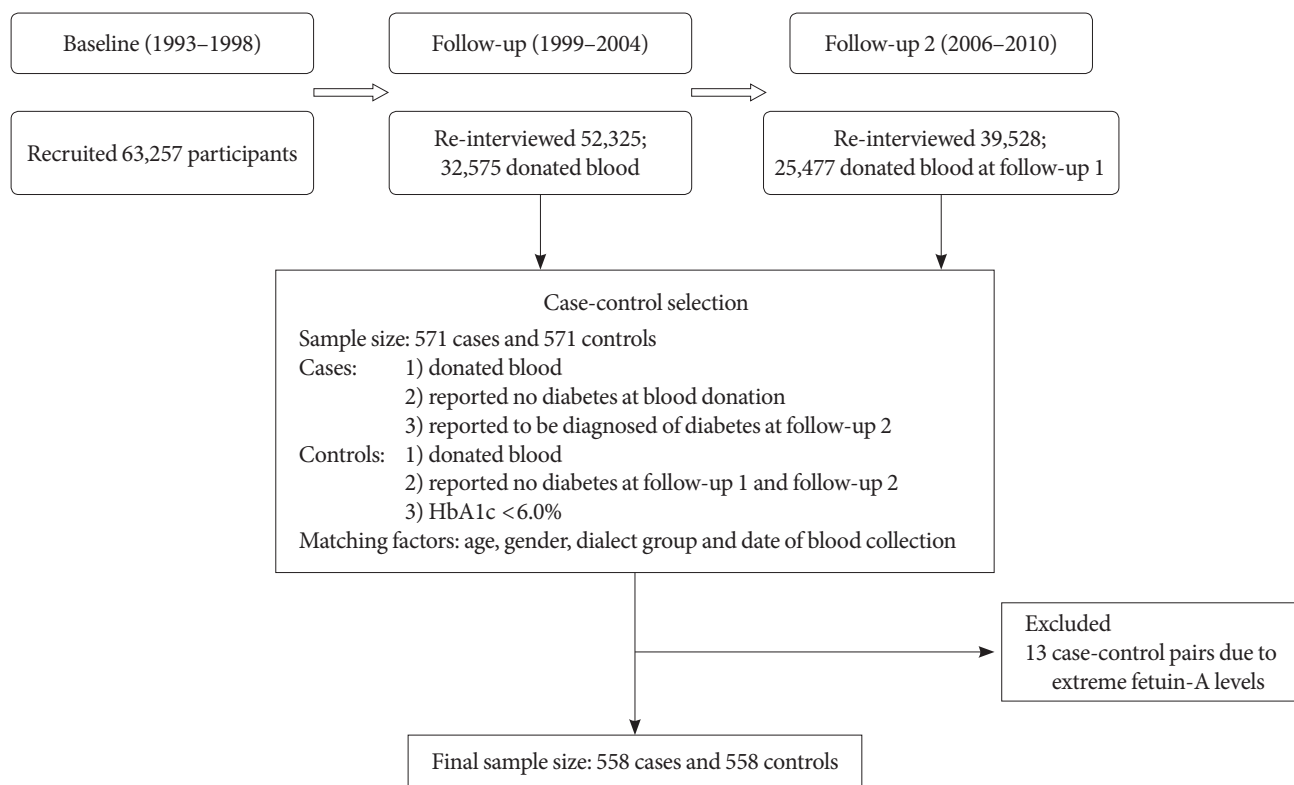

**Supplementary Fig. 1.** Participant flowchart of the type 2 diabetes mellitus nested case-control study in the Singapore Chinese Health Study. HbA1c, glycosylated hemoglobin.
